# Supplementary material
Source: HighWire-hosted journal article supplement (https://cmaj.ca/highwire/filestream/58934/field_highwire_adjunct_files/0/13-0806_appendix.pdf)
Supplement: 13-0806_appendix.pdf [file 13-0806_appendix.pdf]

| <b>Appendix 1:</b> Odds ratios for effective pharmacologic and behavioural smoking cessation interventions (v. each other, placebo or control) in achieving long-term abstinence                                                             |                     |
|----------------------------------------------------------------------------------------------------------------------------------------------------------------------------------------------------------------------------------------------|---------------------|
| Intervention                                                                                                                                                                                                                                 | Odds ratio (95% CI) |
| <b>Pharmacologic<sup>1</sup></b>                                                                                                                                                                                                             |                     |
| NRT v. placebo                                                                                                                                                                                                                               | 1.84 (1.71–1.99)    |
| NRT patch v. placebo                                                                                                                                                                                                                         | 1.91 (1.71–2.14)    |
| NRT gum v. placebo                                                                                                                                                                                                                           | 1.68 (1.51–1.88)    |
| Combination NRT v. placebo                                                                                                                                                                                                                   | 2.73 (2.07–3.65)    |
| Combination NRT v. NRT patch                                                                                                                                                                                                                 | 1.43 (1.08–1.91)    |
| Combination NRT v. NRT gum                                                                                                                                                                                                                   | 1.63 (1.21–2.20)    |
| Bupropion v. placebo                                                                                                                                                                                                                         | 1.82 (1.60–2.06)    |
| Varenicline v. placebo                                                                                                                                                                                                                       | 2.88 (2.40–3.47)    |
| Varenicline v. NRT                                                                                                                                                                                                                           | 1.57 (1.29–1.91)    |
| Varenicline v. NRT patch                                                                                                                                                                                                                     | 1.51 (1.22–1.87)    |
| Varenicline v. NRT gum                                                                                                                                                                                                                       | 1.72 (1.38–2.13)    |
| Varenicline v. bupropion                                                                                                                                                                                                                     | 1.59 (1.29–1.96)    |
| <b>Behavioural</b>                                                                                                                                                                                                                           |                     |
| Individual counselling v. control* <sup>2</sup>                                                                                                                                                                                              | 1.39 (1.24–1.57)    |
| Group therapy v. self-help or less intensive interventions <sup>3</sup>                                                                                                                                                                      | 1.98 (1.60–2.46)    |
| <b>Combined pharmacologic and behavioural</b>                                                                                                                                                                                                |                     |
| Pharmacotherapy plus behavioural treatment† v. control <sup>4</sup>                                                                                                                                                                          | 1.82 (1.66–2.00)    |
| <small>Note: CI = confidence interval, NRT = nicotine replacement therapy.<br/> *Control includes usual care, brief advice or less intensive behavioural support.<br/> †Behavioural treatment includes brief advice and counselling.</small> |                     |

## References

1. Cahill K, Stevens S, Perera R, et al. Pharmacological interventions for smoking cessation: an overview and network meta-analysis [review]. *Cochrane Database Syst Rev* 2013;(5):CD009329.
2. Lancaster T, Stead L. Individual behavioural counselling for smoking cessation [review]. *Cochrane Database Syst Rev* 2005;(2):CD001292.
3. Stead L, Lancaster T. Group behaviour therapy programmes for smoking cessation [review]. *Cochrane Database Syst Rev* 2005;(2):CD001007.
4. Stead L, Lancaster T. Combined pharmacotherapy and behavioural interventions for smoking cessation [review]. *Cochrane Database Syst Rev* 2012;10:CD008286.
